# Supplementary material
Source: PubMed Central journal article supplement (PMC1850761)

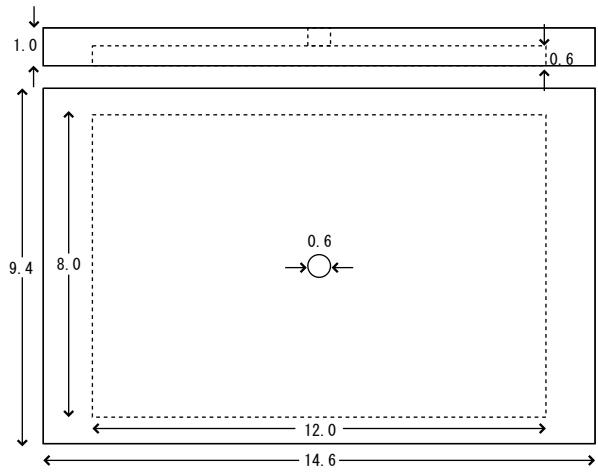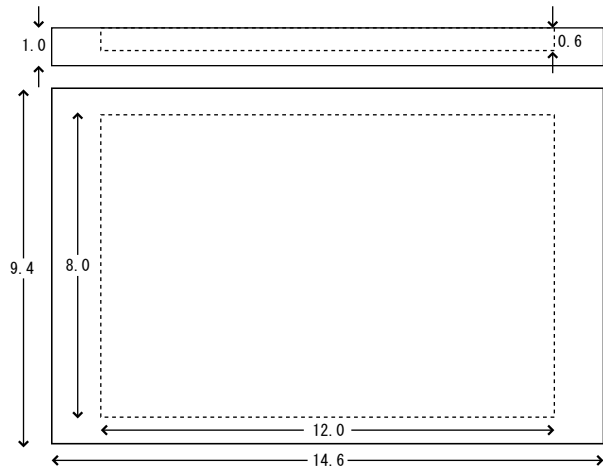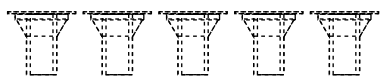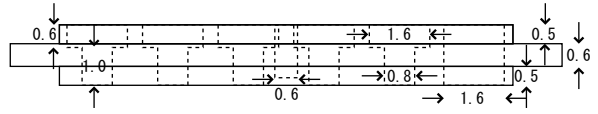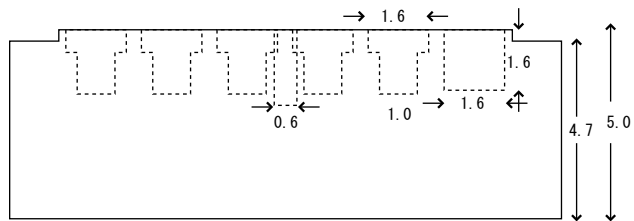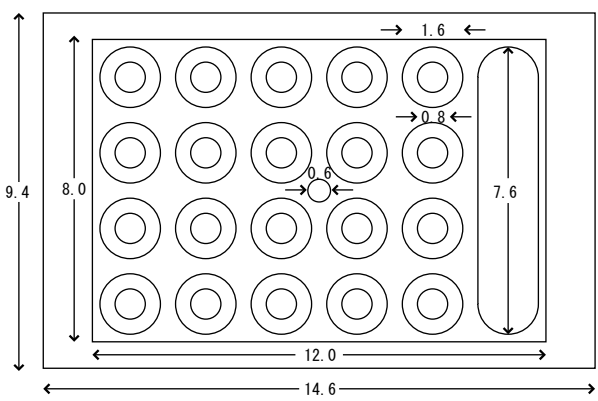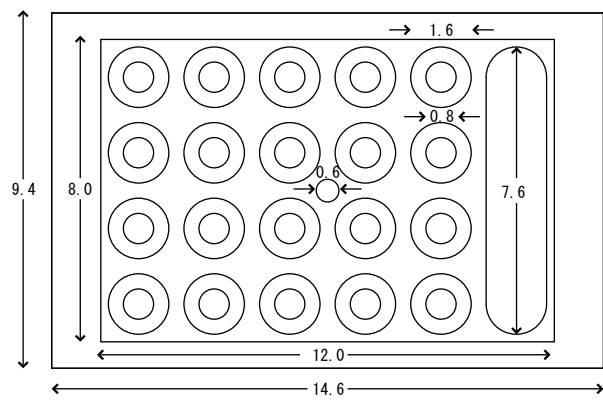

Supplement: NIHMS11827-supplement-Supplement_1.pdf [file NIHMS11827-supplement-Supplement_1.pdf]
